1 **From Molecular Dynamics to Supramolecular Organization: The Role of PIM**  
2 **Lipids in the Originality of the *Mycobacterial* Plasma Membrane**

3  
4 *Chelsea M. Brown*<sup>1</sup>, *Robin A. Corey*<sup>2</sup>, *Ya Gao*<sup>3</sup>, *Yeol Kyo Choi*<sup>4</sup>, *Martine Gilleron*<sup>5</sup>, *Nicolas*  
5 *Destainville*<sup>6</sup>, *Elizabeth Fullam*<sup>1</sup>, *Wonpil Im*<sup>3,\*</sup>, *Phillip J. Stansfeld*<sup>1,7,\*+\*</sup>, *Matthieu Chavent*<sup>5,\*+</sup>

6  
7 <sup>1</sup> School of Life Sciences,  
8 University of Warwick,  
9 Coventry,  
10 CV4 7AL,  
11 UK

12  
13 <sup>2</sup> Department of Biochemistry,  
14 University of Oxford,  
15 Oxford,  
16 UK

17  
18 <sup>3</sup> School of Mathematics, Physics and Statistics,  
19 Shanghai University of Engineering Science,  
20 Shanghai 201620,  
21 China

22  
23 <sup>4</sup> Department of Biological Sciences,  
24 Department of Chemistry,  
25 Department of Bioengineering,  
26 Lehigh University,  
27 Pennsylvania 18015,  
28 USA

29  
30 <sup>5</sup> Institut de Pharmacologie et Biologie Structurale,  
31 CNRS, Université de Toulouse,  
32 205 route de Narbonne,  
33 31400, Toulouse,  
34 France

35  
36 <sup>6</sup> Laboratoire de Physique Théorique,  
37 CNRS, Université Paul Sabatier,  
38 31062 Toulouse,  
39 France

40

41 <sup>7</sup> Department of Chemistry,  
42 University of Warwick,  
43 Coventry,  
44 CV4 7AL,  
45 UK

46  
47 + equal contribution

48  
49 \*to whom correspondence should be addressed:

50 e-mail: [wonpil@lehigh.edu](mailto:wonpil@lehigh.edu)

51 phone: +1 (0) 610-758-4524

52

53 e-mail: [phillip.stansfeld@warwick.ac.uk](mailto:phillip.stansfeld@warwick.ac.uk)

54 phone: +44 (0) 2476523864

55

56 e-mail: [matthieu.chavent@ipbs.fr](mailto:matthieu.chavent@ipbs.fr)

57 phone: +33 (0) 5-61-17-59-00

58

59 **Abstract**

60 *Mycobacterium tuberculosis* (*Mtb*) is the causative agent of tuberculosis, a disease  
61 that claims ~1.5 million lives annually. The current treatment regime is long and  
62 expensive, and missed doses contribute to drug resistance. There is much to be  
63 understood about the *Mtb* cell envelope, a complicated barrier that antibiotics need to  
64 negotiate to enter the cell. Within this envelope, the plasma membrane is the ultimate  
65 obstacle and is proposed to be comprised of over 50% mannosylated  
66 phosphatidylinositol lipids (phosphatidyl-*myo*inositol mannosides, PIMs), whose role  
67 in the membrane structure remains elusive. Here we used multiscale molecular  
68 dynamics (MD) simulations to understand the structure-function relationship of the  
69 PIM lipid family and decipher how they self-organize to drive biophysical properties of  
70 the *Mycobacterial* plasma membrane. To validate the model, we tested known anti-  
71 tubercular drugs and replicated previous experimental results. Our results shed new  
72 light into the organization of the *Mycobacterial* plasma membrane and provides a  
73 working model of this complex membrane to use for *in silico* studies. This opens the  
74 door for new methods to probe potential antibiotic targets and further understand  
75 membrane protein function.

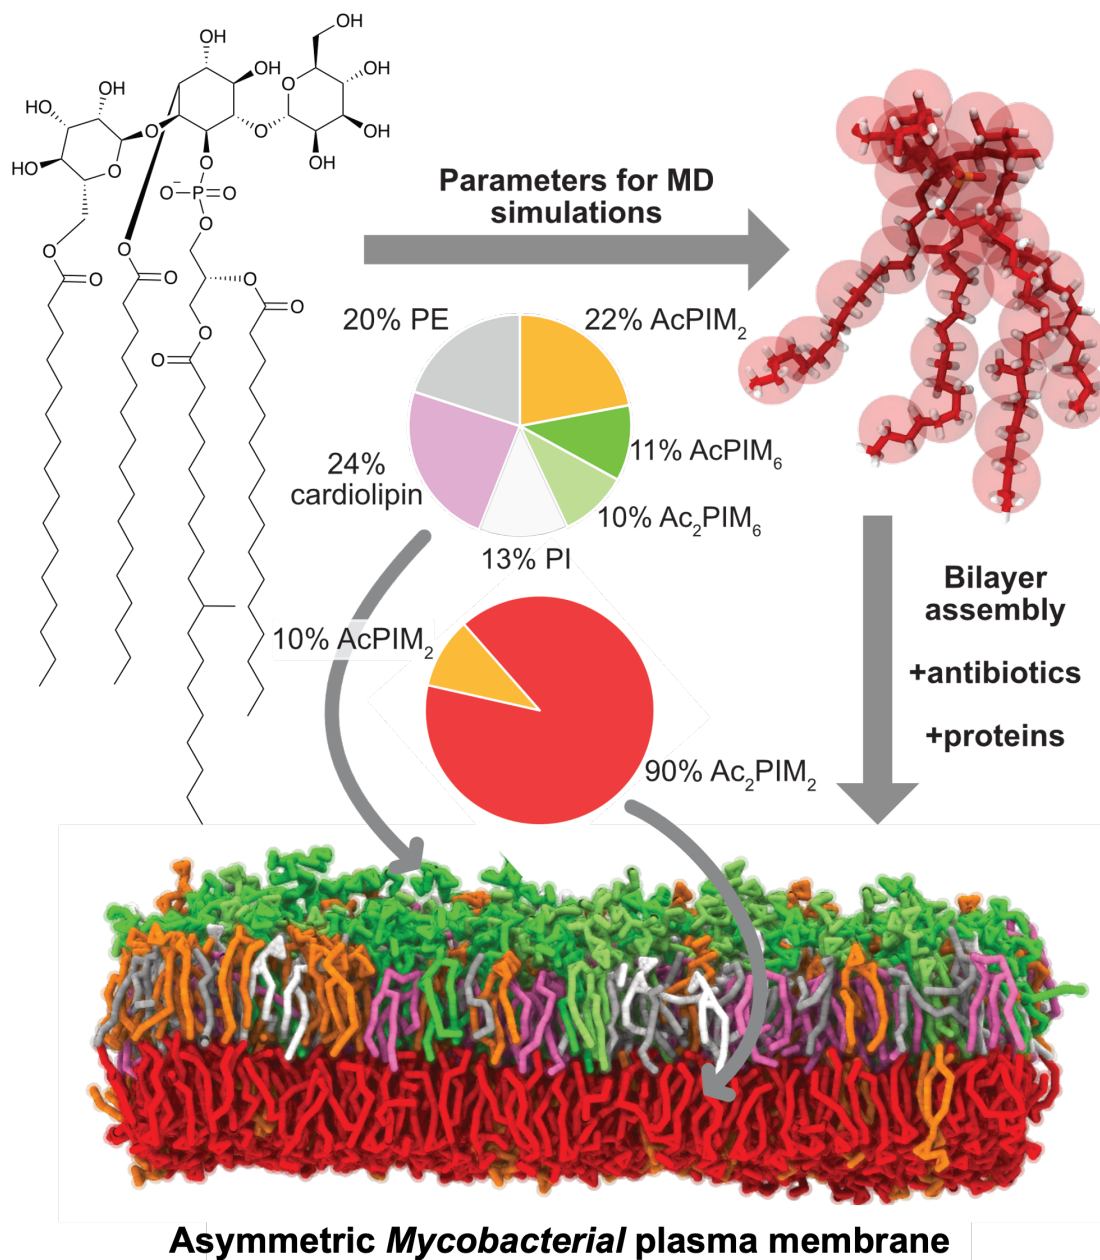



## 77 Introduction

78 Tuberculosis (TB) is caused by *Mycobacterium tuberculosis* (*Mtb*). In 2020 alone,  
79 there were an estimated 10 million new *Mtb* infections, leading to 1.5 million deaths<sup>1</sup>.  
80 Thus, *Mtb* is one of the world's leading infectious killers, despite the availability of both  
81 a treatment regime and a vaccine. The current course of antibiotics for drug  
82 susceptible TB cases can last as long as 6 months and consists of four drugs given in  
83 combination<sup>2</sup>. This is not only expensive and demanding for the patient, but also  
84 encourages non-compliance that contributes towards the rise in multi-drug resistant  
85 TB<sup>1</sup>. It is obvious that new treatments and a better vaccine are needed to meet the  
86 World Health Organization's 'End TB Strategy'. Their plan aims to reduce TB-related  
87 deaths by 90% by 2030, and thereby curtail the enormous public health cost caused  
88 by TB<sup>3</sup>. The COVID-19 pandemic has undone some of the progress that had been  
89 made in the treatment of TB as fewer people were able to be diagnosed or access  
90 medication<sup>4</sup>, which may create a worldwide surge of untreatable cases. Thus, there is  
91 a pressing need for innovative research into the mechanisms of *Mtb* virulence and its  
92 ability to survive within the host for extended periods to help develop alternative  
93 intervention strategies.

94 One issue in developing new treatments for TB is the complexity of the  
95 *Mycobacterial* cell envelope<sup>5, 6</sup>. This cell envelope consists of an array of lipids  
96 contributing to both hydrophobic and polar regions of various thicknesses and  
97 densities, making it extremely challenging to predict how molecules will cross this  
98 barrier and enter the cell. The cell envelope is generally described as having four  
99 distinct layers: the *mycomembrane* (or outer membrane) comprised of mycolic acids  
100 and phthiocerols, an arabinogalactan-peptidoglycan layer, the periplasmic space  
101 containing lipomannan (LM) and lipoarabinomannan (LAM) and finally the inner  
102 membrane, or the plasma membrane<sup>7</sup>. The *Mycobacterial* plasma membrane has a  
103 key role in controlling nutrient/antibiotic uptake and contains important membrane  
104 proteins that are targets for antitubercular drugs<sup>8</sup>, such as SQ109 that inhibits the  
105 transporter MmpL3<sup>9</sup>. On the other hand, we are becoming increasingly aware of how  
106 *Mtb* plasma membrane organization, such as the formation of functional membrane  
107 microdomains<sup>10</sup>, can affect the survival ability of *mycobacteria*. Therefore,  
108 understanding the molecular organization and dynamics of the *Mtb* plasma membrane  
109 is essential for developing effective drug candidates.

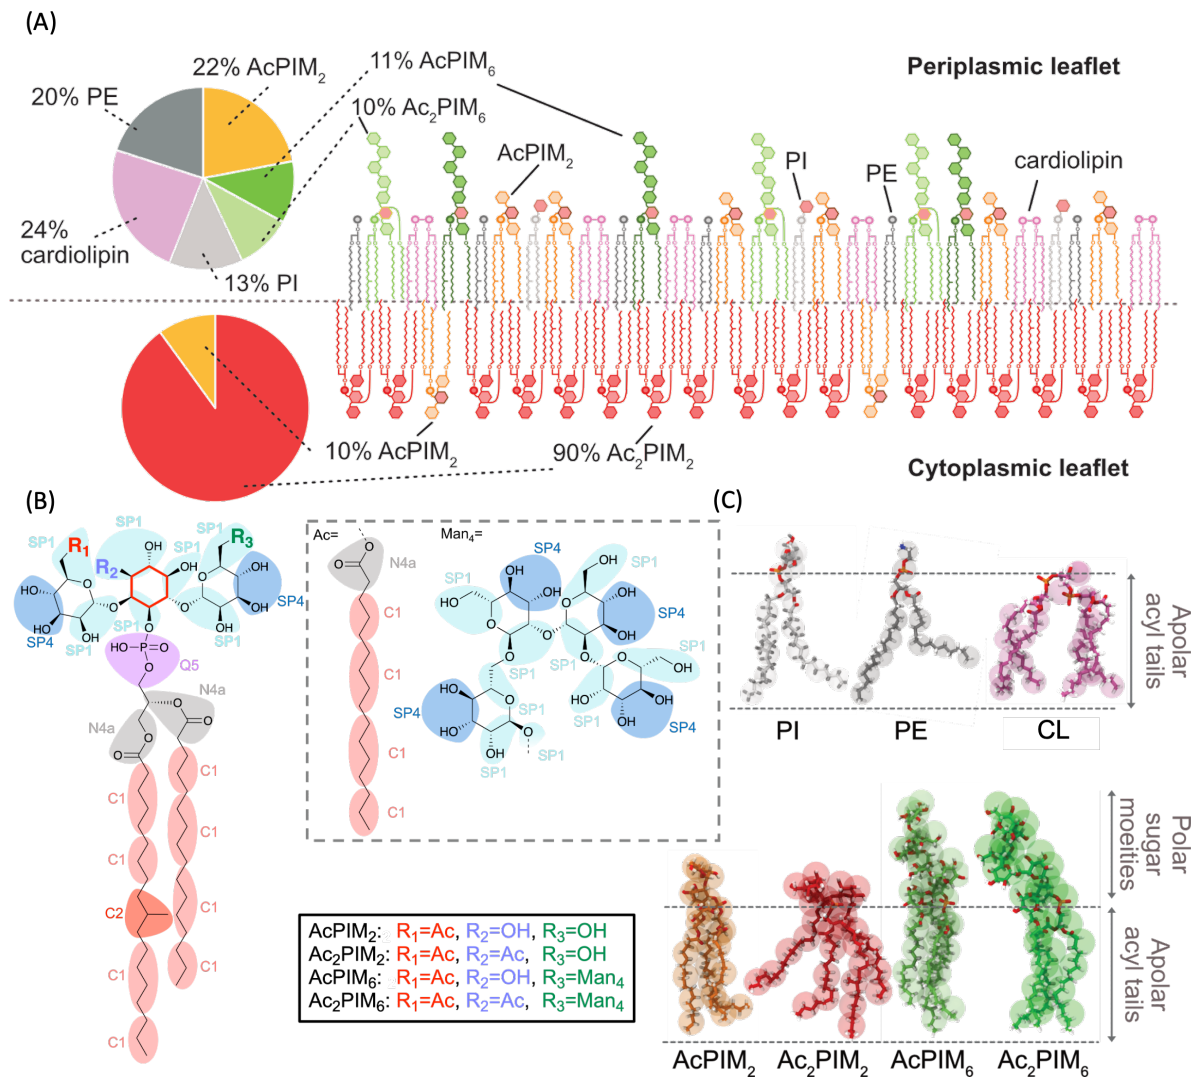

111

112 **Figure 1:** The structure of the *Mycobacterial* plasma membrane and PIM lipids. **(A)** Schematic of the  
 113 plasma membrane of *Mycobacteria* with the compositions previously defined<sup>11</sup>. **(B)** Schematic of the  
 114 core of the PIM lipids found in *Mycobacteria* with the groupings for CG overlaid. The inositol core is  
 115 highlighted in red. The bead types for MARTINI 3 are shown beside. **(C)** Overlay of the AT (sticks) and  
 116 CG (spheres) models for each lipid, with chemical characteristics shown to the right.

117

118 The *Mycobacterial* plasma membrane is composed of a variety of lipids and  
 119 glycolipids (**Figure 1A**): cardiolipin (CL), phosphatidylethanolamine (PE),  
 120 phosphatidyl-*myo*inositol (PI), trehalose monomycolate (TMM) and phosphatidyl-  
 121 *myo*inositol mannosides (PIMs)<sup>11</sup>, with the PIMs accounting for over half the dry weight  
 122 of the plasma membrane lipids<sup>11</sup>. These lipids comprise of a modified  
 123 phosphatidylinositol core decorated with two mannose residues and one acyl chain  
 124 (**Figure 1B**). Furthermore, additional modifications of an acyl group and up to 4  
 125 mannose sugars can be added to the core headgroup<sup>12, 13</sup> (**Figure 1B** and **SI Figure**  
 126 **1**). The plasma membrane is proposed to be asymmetric<sup>11</sup>, with Ac<sub>2</sub>PIM<sub>2</sub> being the

127 dominant species in the cytoplasmic leaflet accompanied by AcPIM<sub>2</sub>, while the  
128 periplasmic leaflet is more varied, containing AcPIM<sub>2</sub>, AcPIM<sub>6</sub>, Ac<sub>2</sub>PIM<sub>6</sub>, CL, PI, PE  
129 and TMM<sup>5, 11, 14, 15</sup>. PIM<sub>6</sub> lipids can be further modified to LM and LAM that make up  
130 the bulk of the periplasmic space<sup>16</sup>. Due to the complexity of the *Mycobacterial* cell  
131 envelope, the dynamics and properties of the plasma membrane alone is extremely  
132 difficult to probe experimentally.

133 Lipid interactions with proteins can be key for understanding mechanisms of  
134 action and potential new targets for drugs<sup>17</sup>. Modulation of human serotonin receptors  
135 by cholesterol<sup>18</sup> and gating of bacterial Kir potassium channels by anionic lipids are  
136 observed experimentally<sup>19</sup>, but limited effects of lipids on *Mycobacterial* proteins are  
137 determined. Structures of important *Mycobacterial* membrane proteins are starting to  
138 emerge<sup>20, 21</sup>, but experimental information about the surrounding lipids and their  
139 interactions are difficult to resolve.

140 Molecular dynamics (MD) simulations have been used to study lipid  
141 organization and the formation of domains on a large scale<sup>22</sup> as well as comparative  
142 studies of eukaryotic, prokaryotic, and archaeal membranes<sup>23</sup>. Despite this, at the time  
143 of writing, there are no complete models of the *Mycobacterial* plasma membrane that  
144 capture the asymmetry and the range of complex lipids<sup>24</sup>. As a result, *Mycobacterial*  
145 membrane proteins cannot be simulated in a native environment. There are growing  
146 tools to embed proteins in membranes *in silico*<sup>25, 26 27, 28</sup>, meaning that their behavior  
147 can be studied using MD simulations. Such simulations have shown that  
148 phosphatidylinositol phosphate lipids (PIPs) can modulate ephrin receptors in  
149 humans<sup>29</sup>, while CL can bind to a range of *E. coli* membrane proteins<sup>30</sup>. It is therefore  
150 timely to develop models of the major phospholipids of the *Mycobacterial* envelope for  
151 application in MD simulations. This will enable studies into the dynamics of the  
152 membrane, specific lipid interactions with integral membrane proteins and diffusion of  
153 antibiotics across this barrier. By performing simulations of these systems with a  
154 coarse grained (CG) representation, key interactions may be probed over a large  
155 timescale and established prior to conversion to atomistic (AT) resolution for further  
156 in-depth evaluation.

157 Herein, multiscale simulations were used to analyze the structure-function  
158 relationship of the four main PIM lipids (AcPIM<sub>2</sub>, Ac<sub>2</sub>PIM<sub>2</sub>, AcPIM<sub>6</sub> and Ac<sub>2</sub>PIM<sub>6</sub>) found  
159 in the *Mycobacterial* membrane. An asymmetric bilayer containing these lipids was  
160 assembled and simulated, showing the stability of this composition. A global analysis

161 of the membrane shows lipid diffusion and no excessive clustering throughout the  
162 simulations. We provide CG structures of antibiotics known to interact with the  
163 membrane and membrane proteins and replicate experimental results<sup>31</sup>. Overall, we  
164 have developed a robust representation of the *Mycobacterial* plasma membrane.

165

## 166 **Methods**

167

### 168 *Building the coarse-grained lipid parameters*

169 The CG models of the lipids were parametrized for the newly released MARTINI 3  
170 force field<sup>32</sup> and generated using the protocol described for small molecules<sup>33</sup> on the  
171 MARTINI website ([http://cgmartini.nl/index.php/martini-3-tutorials/parameterizing-a-](http://cgmartini.nl/index.php/martini-3-tutorials/parameterizing-a-new-small-molecule)  
172 [new-small-molecule](http://cgmartini.nl/index.php/martini-3-tutorials/parameterizing-a-new-small-molecule)). The bead types and mapping to the PIM molecules were  
173 performed manually, comparing with the recently published CG model of PI<sup>34</sup>. Atoms  
174 were grouped according to functional groups, in sets of 3-5 non-hydrogen atoms. The  
175 CG mapping of Ac<sub>x</sub>PIM<sub>x</sub> is shown in **Figures 1B,C**. The parameter files that describe  
176 the bonds, constraints, and angles were assembled based on the previously described  
177 data<sup>32, 34, 35</sup> as an initial estimate.

178 Simulations of each lipid were set up using a modified version of *insane.py*  
179 python script<sup>27</sup>, embedding one copy of a PIM lipid in a 10 x 10 nm<sup>2</sup>  
180 phosphatidylcholine (PC) bilayer. The system was solvated with water and neutralized  
181 with 150 mM NaCl, followed by minimization using the steepest descents algorithm.  
182 The system was then simulated for 3  $\mu$ s using a timestep of 20 fs at 310 K. The lipids,  
183 solvent and ions were temperature coupled separately. The velocity rescale<sup>36</sup> and  
184 Parrinello-Rahman<sup>37</sup> coupling methods were used with the time constants  $\tau_T = 1.0$  ps  
185 and  $\tau_p = 12.0$  ps for temperature and pressure, respectively. Simulations were run  
186 using GROMACS version 2021.3<sup>38</sup>. The reaction-field algorithm<sup>39</sup> was used for  
187 electrostatic interactions with a cut-off of 1.1 nm. A single cut-off of 1.1 nm was used  
188 for the van der Waals interaction. Five repeats were performed for each lipid (**SI**  
189 **Figure 2**).

190

### 191 *Generating atomistic data*

192 Parameters for the AT Ac<sub>x</sub>PIM<sub>x</sub> lipids were generated using the CHARMM force field<sup>40</sup>.  
193 The CHARMM-GUI<sup>41</sup> server was used to set up the lipid systems for GROMACS with  
194 the CHARMM36m force field<sup>42, 43</sup>. One PIM lipid was embedded in an 8 x 8 nm<sup>2</sup> PC

195 bilayer. The system was solvated with 150 mM NaCl and minimized and equilibrated  
196 as per the Membrane Builder workflow<sup>28</sup>. The system was further minimized using the  
197 steepest descents. Simulations were run for 2  $\mu$ s using a timestep of 2 fs at 310 K.  
198 The lipids, solvent and ions were temperature coupled separately. The velocity  
199 rescale<sup>36</sup> and C-rescale coupling methods were used with the time constants  $\tau_T = 0.1$   
200 ps and  $\tau_p = 1.0$  ps for temperature and pressure, respectively. Simulations were run  
201 using GROMACS version 2021.3<sup>38</sup>. The particle mesh Eward (PME)<sup>44</sup> method was  
202 used for electrostatic interactions with a cut-off of 1.2 nm. A single cut-off of 1.2 nm  
203 was used for the van der Waals interaction. Three repeats were performed for each  
204 lipid (**SI Figure 2**).

205

### 206 *Refining coarse-grained parameters*

207 The AT and CG representations of the four main PIM lipids are shown in **Figure 1C**.  
208 The distributions of the distances and angles were measured using the *gmx* tools  
209 (*distance*, *gangle* and *analyze*). For the AT simulations, the atoms were grouped  
210 according to their mapping and its center of geometry was used for calculations. The  
211 values for each bond/constraint and angle were iteratively refined based on the  
212 comparison of probability distribution, and the results are summarized in **SI Figures**  
213 **3-8**. When there was agreement between the AT and CG data, the solvent accessible  
214 surface area was measured using the *gmx sasa* tool to verify that the models behaved  
215 the same (**SI Figure 8C**). Diffusion, shape of the lipids, clustering of ions and  
216 aggregation were also measured on a single lipid level (**SI Methods** and **SI Figures**  
217 **9-17**). It is important to note that there are no energy barriers for the dihedral angles.

218

### 219 *Measuring area per lipid*

220 Before setting up the complete bilayer system, the area per lipid was measured. The  
221 simulations were assembled as described above for CG, using a homogenous  
222  $Ac_xPIM_x$  membrane (**SI Figure 2**). The area of XY-dimension was measured using  
223 *gmx energy* and then dividing the area by the number of lipids in one leaflet over the  
224 course of the trajectory, and final values extracted using *gmx analyze*, as per the  
225 protocol described on the MARTINI website ([http://cgmartini.nl/index.php/tutorials-](http://cgmartini.nl/index.php/tutorials-general-introduction-gmx5/bilayers-gmx5#Area-per-lipid)  
226 [general-introduction-gmx5/bilayers-gmx5#Area-per-lipid](http://cgmartini.nl/index.php/tutorials-general-introduction-gmx5/bilayers-gmx5#Area-per-lipid)).

227

228



## 229 *Bilayer composition and set-up*

230 The ratio of lipids in each bilayer was obtained by using their molecular weight and the  
231 previously reported dry masses<sup>11</sup> of the individual lipids, and the exact calculations  
232 can be seen in **SI Figure 18**. Since the specific apolar lipids were not named, they  
233 were not included in this study. TMM was not included as there is no available refined  
234 atomistic model, the behavior of the mycolic acid is predicted to be complicated<sup>45</sup>, and  
235 there is a relatively small proportion of TMM predicted to be present in the membrane.  
236 The exact composition of the simulated plasma membrane is shown in **Figure 1A**.

237 The PI and PE lipids in *Mycobacteria* are slightly different in structure to the  
238 corresponding *E. coli* lipids described in the MARTINI force field<sup>34 32</sup>: a methyl group  
239 replaces the alkene found in one of the acyl chains (**SI Figure 1**). Before assembling  
240 the membrane, the parameters for these lipids were modified by adapting the refined  
241 Ac<sub>2</sub>PIM<sub>2</sub> acyl tail parameters and changing the existing tail. The CL parameters were  
242 transferred over from the MARTINI 3 beta force field<sup>30</sup>.

243 Simulations of the bilayer were set up using a modified version of *insane.py*  
244 python script<sup>27</sup> using the composition shown in **Figure 1A**, where the area per lipid for  
245 the periplasmic membrane was set to 0.92 nm<sup>2</sup> and the cytoplasmic leaflet set to 1.13  
246 nm<sup>2</sup>. The systems were then treated the same as described for the initial CG systems  
247 with added equilibration steps as per the Membrane Builder workflow<sup>28</sup> before the  
248 production simulation. There were two types of system assembled. The first one has  
249 a simulation box size of 20 x 20 x 15 nm<sup>3</sup> and one repeat was performed for 10 μs at  
250 290 K, 300 K, 310 K, 320 K and 350 K. The second one has a box size of 50 x 50 x  
251 15 nm<sup>3</sup> and a single repeat was performed for 10 μs at 310 K (**Figure 2A** and **SI**  
252 **Figure 2**).

## 253 254 *Behavior of the membrane*

255 To calculate the bending rigidities, the strategy proposed by Fowler *et al.*<sup>46</sup> to extract  
256 the bending modulus from CG simulations was followed. The membrane midplane  
257 position in Monge representation was determined by extracting the coordinates of all  
258 CG beads at the extremities of lipid fatty acid chains. Using a built-in function of the  
259 Mathematica software package, the positions were interpolated to get a smooth  
260 function before Fourier-transforming with a fast Fourier transform algorithm. From the  
261 so-obtained Fourier modes, the spectral density (or power spectrum) was estimated:

262 
$$S(q) = L^2 k_B T \left( 1/(\kappa q^4) + 1/(\sigma_p r q^2) \right)$$

263 for a tensionless membrane, where  $L^2$  is the projected area in the  $(x, y)$  plane,  $k_B T$  is  
264 the thermal energy and  $\sigma_p r \sim 0.1 \text{ J/m}^2$  is the tension associated with lipid protrusions  
265 at the nanometer scale.  $S(q)q^4$  was plotted as a function of  $q$  and fit it with a second  
266 order polynomial  $P(q) = a + bq^2$ , from which estimates of  $\kappa$  (and  $\sigma_p r$  if needed) were  
267 obtained (**SI Figure 19**). The error bars are standard deviations provided by the fitting  
268 function in Mathematica.

269 Diffusion, bilayer thickness and number of neighbors was measured using  
270 LiPyphilic<sup>47</sup> (**Figures 2B,C, SI Methods** and **SI Figure 20**). The xy-positions of single  
271 lipids were tracked with PLUMED<sup>48</sup> (**Figure 2B**). Area per lipid for the membrane was  
272 calculated using FATSLIM<sup>49</sup> (**Figure 2D**). The density of each constituent was  
273 measured using *gmx density* (**Figure 2E**). Plots were created using Matplotlib<sup>50</sup>.

274

#### 275 *Antibiotic simulations*

276 Bedaquiline (BDQ) and isoniazid (ISZ) were mapped to CG using PyCGTOOL<sup>51</sup>  
277 following 200 ns AT simulations with parameters from CHARMM-GUI<sup>52</sup> (**Figure 3A**).

278 BDQ was first simulated with the *Mycobacterial* membrane alone to confirm  
279 association with the membrane (**SI Figures 2,21**). The *Mtb* a- and c-subunits of F-  
280 ATPase, BDQ's target in the *Mycobacterial* membrane, was modelled using  
281 SwissModel<sup>53</sup> based on a structure from *Mycobacterium smegmatis*<sup>31</sup> (PDB: 7JGC,  
282 **Figure 3C** and **SI Figures 22A,B**). The sequence identity at the amino acid level  
283 between *Mtb* and *M. smegmatis* for the F-ATPase was calculated using Clustal  
284 Omega<sup>54</sup> at 80% and 72% for c- and a-subunits, respectively. The system with the  
285 protein in a *Mycobacterial* membrane was assembled using martinize2<sup>55</sup>,  
286 memembed<sup>56</sup> and the modified *insane.py* python script<sup>27</sup>, with eight molecules of BDQ  
287 placed either in the periplasmic or cytoplasmic leaflet with five repeats in each  
288 membrane (**SI Figure 2**). Simulations were run for 10  $\mu\text{s}$  using the same setting as  
289 described above. The xyz-positions of BDQ, the lipids and the backbone beads were  
290 tracked over the course of the simulations with PLUMED<sup>48</sup> and plotted with  
291 Matplotlib<sup>50</sup>, and the results are shown in **Figure 3D** and **SI Figures 22C,D, 23**. The  
292 density of each constituent was measured using *gmx density* and plotted using  
293 Matplotlib<sup>50</sup> and the results are shown in **Figure 3E** (with representative positions  
294 shown in **Figure 3F**). The interaction of BDQ with the protein was calculated using

295 PyLipID<sup>57</sup> (**Figure 3G** and **SI Figures 24,25**). The same simulation set up was  
296 performed with a model *E. coli* (simple) membrane (75% PE, 15% PG, 10% CL) and  
297 the z-position of BDQ can be seen in **SI Figure 26**.

298

### 299 *PMF calculations*

300 The potential of mean force (PMF) calculations were run as previously described<sup>58</sup>.  
301 For the F-ATPase-BDQ PMF, a representative pose of BDQ bound to the protein was  
302 produced using PyLipID from equilibrium simulations and built into a 12 x 20 x 11 nm  
303 *Mycobacterial* membrane and minimized and equilibrated, as described above. Light  
304 (50 kJ/mol/nm<sup>2</sup>) *xy* positional restraints were added to Ala 66 on three c-subunits to  
305 prevent the protein from rotating in the membrane. Following 50 ns of equilibration,  
306 the BDQ was steered away from the protein along the *y* axis at a rate of 1 nm/ns with  
307 a 1,000 kJ/mol/nm<sup>2</sup> umbrella potential. Frames were extracted at 0.1 nm spacing along  
308 this coordinate to seed a total of 58 x 1.5  $\mu$ s production simulations with a static 1,000  
309 kJ/mol/nm<sup>2</sup> umbrella potential imposed to keep the system in the same position along  
310 the reaction coordinate. The PMF profiles were then constructed using the weighted  
311 histogram analysis method (*gmx wham*) in GROMACS<sup>59, 60</sup>, and employing 200  
312 rounds of Bayesian bootstrapping to report statistical accuracy (**Figure 3H**).

313 For the membrane crossing PMFs, BDQ or ISZ was placed free in the solvent  
314 phase, 7 nm away from the membrane periphery in either an *Mycobacterial* or *E. coli*  
315 membrane. The drug was then steered towards and through the membrane and into  
316 the solvent phase on the other side. Windows were extracted, simulated (1  $\mu$ s for ISZ  
317 per window and 2  $\mu$ s per window for BDQ) and analyzed as described above (**Figure**  
318 **3B**). The `-cycl` option was imposed when running *gmx wham*.

319

## 320 **Results**

321

### 322 *Parameterization & lipid properties*

323 After refinement of the CG parameters, the probability distributions of bonds and  
324 angles from the CG and AT simulations align well (**SI Figures 3-8**), showing that the  
325 behavior of the acyl chains is similar to other phospholipids<sup>27</sup>. The Ac<sub>x</sub>PIM<sub>x</sub>  
326 aggregation in the AT and CG simulations is comparable and shows no permanent  
327 clustering. When lipids did come into contact, all areas of the molecule appear to play  
328 an equal role in the interactions (**SI Figures 15,17**). The interactions are not dominated



329 by the sugars, as was seen with the previous iteration of the MARTINI 2 force field<sup>61</sup>.  
330 The PIM lipids show a higher affinity for ions than PC in CG simulations but the effect  
331 is less apparent in AT simulations (**SI Figure 14**). While the ion concentrations were  
332 the same, the number of ions in the simulation box were different (an order of  
333 magnitude higher for CG), which could explain these results. Overall, CG simulations  
334 of these lipids behave similarly to AT models (interactions with ions as a minor  
335 exception), therefore opening the door to significantly longer simulations by  
336 decreasing the degrees of freedom in the system.

337 The area per lipid in CG for each species in a PC bilayer was found to be 0.93  
338 nm<sup>2</sup> (AcPIM<sub>2</sub>), 1.15 nm<sup>2</sup> (Ac<sub>2</sub>PIM<sub>2</sub>), 1.01 nm<sup>2</sup> (AcPIM<sub>6</sub>), 1.14 nm<sup>2</sup> (Ac<sub>2</sub>PIM<sub>6</sub>), 0.6 nm<sup>2</sup>  
339 (PI), 0.55 nm<sup>2</sup> (PE) and 1.25 nm<sup>2</sup> (CL). It is interesting that the average area per lipid  
340 for the cytoplasmic and periplasmic leaflets slightly differ (1.13 nm<sup>2</sup> and 0.93 nm<sup>2</sup>,  
341 respectively), suggesting that the properties of these leaflets could vary. The diffusion  
342 coefficients for each PIM species in a PC bilayer at 310 K are as follows: 6.7 x 10<sup>-7</sup>  
343 cm<sup>2</sup>/s (AcPIM<sub>2</sub>), 1.1 x 10<sup>-7</sup> cm<sup>2</sup>/s (Ac<sub>2</sub>PIM<sub>2</sub>), 7.6 x 10<sup>-7</sup> cm<sup>2</sup>/s (AcPIM<sub>6</sub>), 6.5 x 10<sup>-7</sup> cm<sup>2</sup>/s  
344 (Ac<sub>2</sub>PIM<sub>6</sub>) (**SI Figure 9**). The difference between AcPIM<sub>x</sub> and Ac<sub>2</sub>PIM<sub>x</sub> shows the effect  
345 of the extra acyl tail in terms of how freely these lipids diffuse through the membrane.

346 The shape of the lipids is approximately the same from AT to CG (**SI Figures**  
347 **10-13**), which agrees with the comparison of the surface areas (**SI Figure 8C**) and the  
348 sugar-phosphate z-distances in Ac<sub>x</sub>PIM<sub>6</sub> (**SI Figures 5C,7C**). The additional mannose  
349 moieties project upwards away from the membrane in both set of simulations.  
350 Interestingly, the tail region of the lipid is measured to occupy approximately the same  
351 amount of space with three or four acyl chains. This is likely due to the placement of  
352 the fourth tail, projecting downwards from the inositol sugar (as highlighted in red in  
353 **Figure 1B**) and hence inhabiting space close to the other acyl chains.

354

### 355 *Mycobacterial membrane biophysical properties*

356 Traditionally, in MD simulations of bacterial membranes, symmetric bilayers are used  
357 to resemble the *E. coli* plasma membrane. On the contrary, the *Mycobacterial* plasma  
358 membrane is an asymmetric bilayer. The published composition of the *Mycobacterial*  
359 plasma membrane<sup>11</sup> (**Figure 1**) (excluding apolar lipids and TMM) was used to  
360 assemble the bilayer. This bilayer was found to be stable during the course of 10 μs  
361 simulation, providing some evidence to confirm what has previously been reported in  
362 the literature<sup>7, 11</sup>. This can be seen in **SI Movie 1**. The thickness of the plasma

363 membrane has been imaged to be between 6.3 nm (*Mycobacterium bovis*) and 7 nm  
 364 (*Mycobacterium smegmatis*)<sup>62-64</sup>, which is slightly larger than the sugar thickness seen  
 365 in our simulations at  $5.3 \pm 0.1$  nm (**Figure 2E**), although in the density plot thicknesses  
 366 of up to 7 nm were observed at the extremes. The difference could be due to the lack  
 367 of LAM and LM present in this membrane model and will be interesting for further  
 368 investigation.

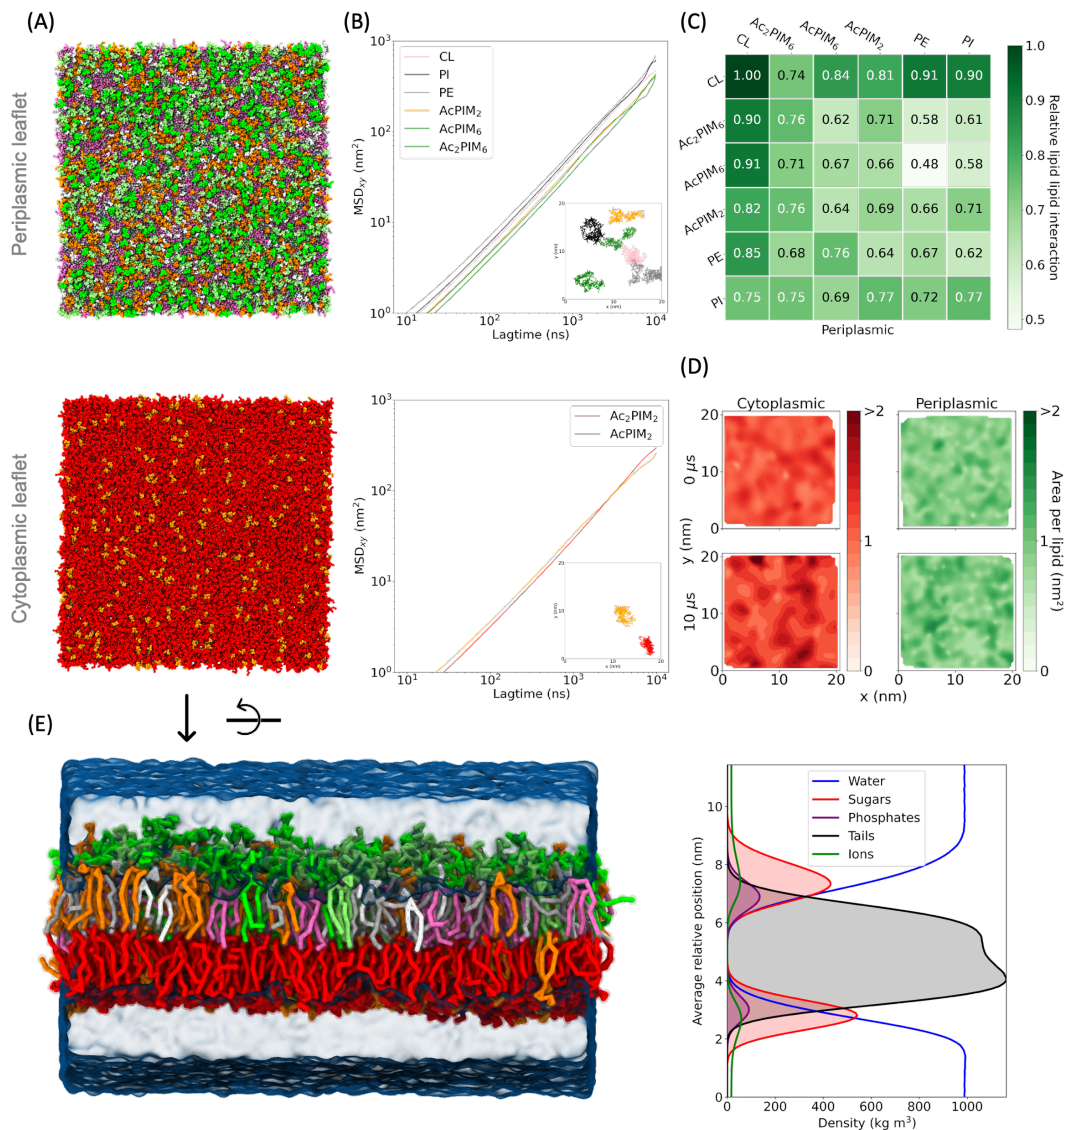

369  
 370 **Figure 2:** A *Mycobacterial* membrane model. (A) Snapshots of the periplasmic and cytoplasmic leaflets  
 371 whose compositions are: AcPIM<sub>2</sub> 22%, AcPIM<sub>6</sub> 11%, Ac<sub>2</sub>PIM<sub>6</sub> 10%, CL 24%, PE 20% and PI 13%  
 372 (periplasmic leaflet) and AcPIM<sub>2</sub> 10% and Ac<sub>2</sub>PIM<sub>2</sub> 90% (cytoplasmic leaflet). The system size is 50 x 50  
 373 x 15 nm. (B) Mean squared displacement (MSD<sub>xy</sub>) (nm<sup>2</sup>) as a function of lagtime (ns) for each lipid type  
 374 in the periplasmic and cytoplasmic leaflets. The inserts show the position of the phosphate group of  
 375 each lipid type over the last 500 ns of the simulation. (C) Relative number of neighbors of each lipid  
 376 type for the periplasmic membrane. (D) Contour plots of the area per lipid (nm<sup>2</sup>) in each leaflet at the

377 starting frame (upper) and final frame (lower) of the simulation. A darker color indicates a larger area  
378 per lipid. (E) Side view of the membrane with each lipid type depicted in a different color as shown in  
379 **Figure 1A**. The density plot shows the density of water, sugar groups, phosphate groups, tail groups  
380 and ions over the simulation box.

381

382 To test the phase behavior of this membrane, we performed simulations at  
383 various temperatures ranging from 290 K to 350 K. For the whole range of  
384 temperatures, lipids are in the liquid phase and diffuse freely (**SI Figure 20**). The  
385 diffusion coefficients for each species in the periplasmic leaflet at 310 K are as follows:  
386  $9.9 \times 10^{-8}$  cm<sup>2</sup>/s (AcPIM<sub>2</sub>),  $6.9 \times 10^{-8}$  cm<sup>2</sup>/s (AcPIM<sub>6</sub>),  $1 \times 10^{-7}$  cm<sup>2</sup>/s (Ac<sub>2</sub>PIM<sub>6</sub>),  $1.3 \times$   
387  $10^{-7}$  cm<sup>2</sup>/s (PI),  $1.5 \times 10^{-7}$  cm<sup>2</sup>/s (PE) and  $1.2 \times 10^{-7}$  cm<sup>2</sup>/s (CL). In the cytoplasmic  
388 leaflet, the values are  $6.1 \times 10^{-8}$  cm<sup>2</sup>/s (AcPIM<sub>2</sub>) and  $8.1 \times 10^{-8}$  cm<sup>2</sup>/s (Ac<sub>2</sub>PIM<sub>2</sub>).  
389 Compared to isolated PIMs in a PC membrane, the diffusion in this plasma membrane  
390 is roughly one order of magnitude slower for the PIMs. AcPIM<sub>2</sub>, which is the only lipid  
391 in both leaflets, has approximately the same diffusion coefficient in both leaflets. Using  
392 a previously reported mammalian plasma membrane<sup>22</sup>, the diffusion coefficients of PE  
393 and PI were calculated to be  $3.3 \times 10^{-7}$  cm<sup>2</sup>/s and  $2.8 \times 10^{-7}$  cm<sup>2</sup>/s, showing that the  
394 diffusion in the mammalian membrane is equivalent to that in the *Mycobacterial*  
395 plasma membrane. Comparing a *Mycobacterial* membrane to a pure PC membrane  
396 and this mammalian plasma membrane, the membrane stiffness is significantly lower  
397 at  $\kappa = 8.2$  k<sub>B</sub>T compared to 13.9 k<sub>B</sub>T and 19.1 k<sub>B</sub>T for the mammalian and PC  
398 membranes, respectively (**SI Figure 19**), highlighting a specific dynamical behavior  
399 for the *Mycobacterial* plasma membrane.

400 Lipid clustering was moderate and membrane composition remained  
401 heterogenous over the course of each 10 μs simulation (**Figure 2B**). This can also be  
402 seen in **Figure 2C** where the number of surrounding lipids of the same type for each  
403 species in the periplasmic membrane is roughly equivalent to that of any other lipid  
404 species. The distribution of the area per lipid in the membrane also suggests high  
405 heterogeneity (**Figure 2D**). The average area per lipid in the membrane over the  
406 course of the simulation is 0.89 nm<sup>2</sup> and 1.18 nm<sup>2</sup> for the periplasmic and cytoplasmic  
407 leaflets, respectively. Thus, the cytoplasmic leaflet appears to be a little denser than  
408 the periplasmic leaflet. This can be related to the packing of the four acyl chains of  
409 Ac<sub>2</sub>PIM<sub>2</sub> lipids present in high concentration in this leaflet<sup>65</sup>. A movie for the change in

410 area per lipid for each leaflet over the course of the simulation can be found in **SI**  
411 **Movies 2,3**.

412 As was seen for the individual lipids in CG the overall bilayer attracted ions,  
413 both Cl<sup>-</sup> and Na<sup>+</sup> concentration was much higher close to the bilayer, especially around  
414 the sugar head groups compared to bulk solution (**Figure 2E**). It has been shown that  
415 lipid-ion interactions can affect the biophysical properties of the membrane, such as  
416 fluidity and stiffness, as well as the structure, which could modify the interaction with  
417 proteins present<sup>66</sup>.

418

#### 419 *Asymmetric interaction of the membrane with antibiotics*

420 We were then interested to test how the organization of this membrane may affect the  
421 behavior of other molecules. We first tested two antibiotics: Isoniazid (ISZ) and  
422 Bedaquiline (BDQ) (see the modelling of these molecules in the Methods section). ISZ  
423 is a first line anti-tubercular treatment that targets InhA, an enzyme that produces a  
424 precursor to mycolic acids<sup>67</sup>. BDQ on the other hand is a last line antibiotic that targets  
425 the membrane protein complex of the ATP synthase<sup>68</sup>. The PMF results of ISZ and  
426 BDQ show that the *Mycobacterial* membrane behaves as expected regarding the  
427 passage of a small molecule through a membrane – showing favorable interactions  
428 with the largely hydrophobic BDQ and unfavourable interactions with ISZ (**Figure 3B**).  
429 The positive charge present on BDQ could account for the sharp decline in energy at  
430 the membrane midplane. The passage of these drugs through a simpler membrane,  
431 recapitulating Gram-negative bacteria inner membrane composition (75% PE, 15%  
432 PG, 10% CL), is symmetric from the mid-plane of the membrane as expected. With  
433 the *Mycobacterial* membrane the interactions of BDQ with the periplasmic leaflet are  
434 about 6 kJ/mol larger than for the simple membrane and the *Mycobacterial*  
435 cytoplasmic leaflet. There is roughly the same difference between the *Mycobacterial*  
436 and simple membranes for ISZ at the mid-membrane region, showing less favorable  
437 passage through the membrane. These results suggest that ISZ, a first-line TB drug,  
438 is likely to enter the cytoplasm *via* a transporter. This contrasts with the uptake  
439 mechanism previously published<sup>69-71</sup>, where a mechanism of passive diffusion is  
440 reported. In our simulations, when the BDQ starting position was in the bulk solvent,  
441 the drug quickly associated with the membrane, as shown in **SI Figure 21**. BDQ shows  
442 no strong preference for either leaflet in these simulations.



443 BDQ has been shown to target the *Mycobacterial* ATP synthase (Rv1304-  
 444 Rv1311), a membrane protein complex, by inducing large conformational changes  
 445 which reveal a binding pocket for BDQ. A Cryo-EM structure from *M. smegmatis* (PDB:  
 446 7JGC) shows multiple binding sites for BDQ at the interface of the c-subunits and the  
 447 interface between the a- and c- subunits<sup>31</sup>. There is a highly negatively charged area  
 448 at this interface (**SI Figure 22A,B**) where the positively charged BDQ<sup>72</sup> interacts.  
 449 Binding of BDQ to these regions has been found to cause stalling of the rotation of the  
 450 c-ring, halting ATP synthesis<sup>73</sup>. BDQ has also been shown to localize in host lipid  
 451 droplets<sup>74</sup>.  
 452

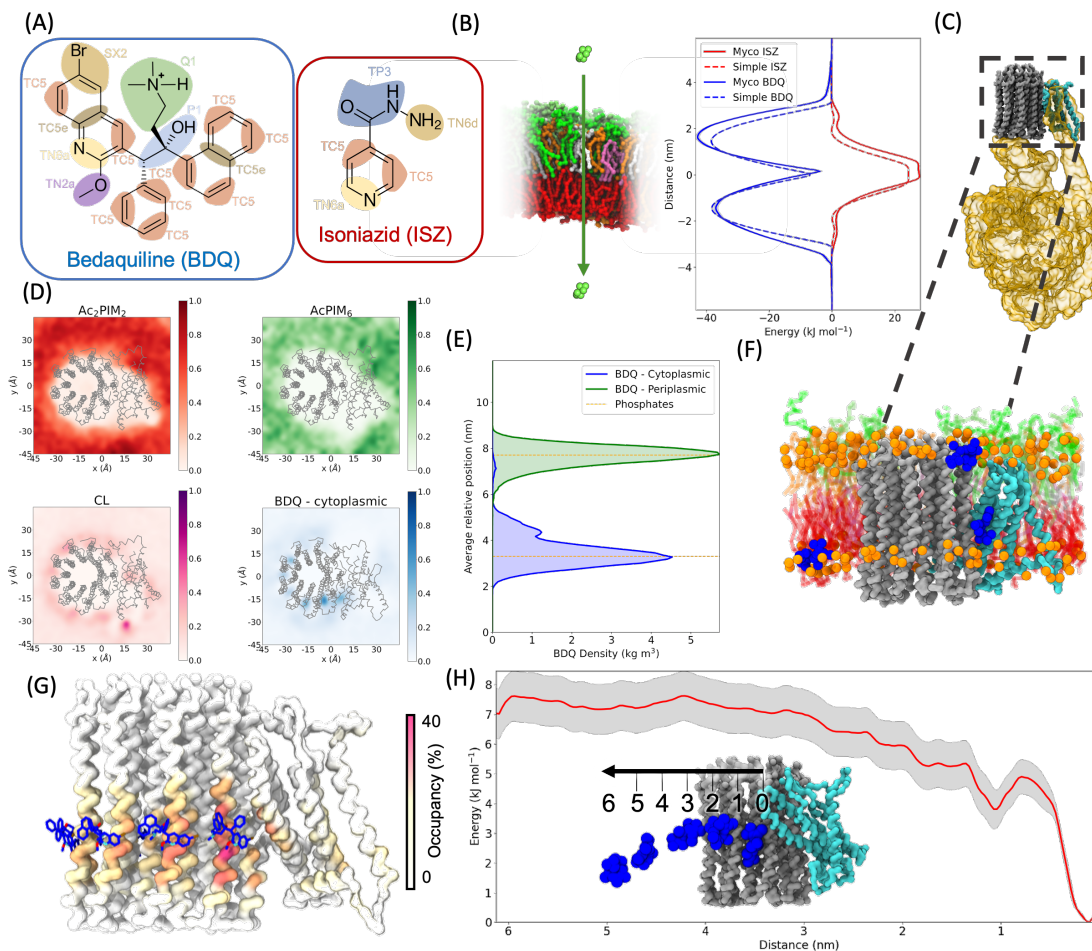

453

454 **Figure 3:** The behavior of the antibiotics with *Mycobacterial* membrane and proteins. (A) Chemical  
 455 structures of BDQ and ISZ with the CG groupings overlaid and bead types shown. (B) PMFs of the two  
 456 antibiotics being pulled through either a *Mycobacterial* or simple membrane in the z-direction. BDQ  
 457 is shown in blue and ISZ in red, with the *Mycobacterial* membrane results having a solid line and simple  
 458 membrane having a dashed line. The error is shown in grey. A schematic of the PMF is shown to the  
 459 left. (C) Structure of *Mycobacterium smegmatis* ATP synthase (PDB: 7JG5) with the c-subunits shown  
 460 in grey, the a-subunit shown in cyan and the other components shown as a gold surface. (D) Density  
 461 in the x and y dimensions of selected lipids and BDQ when starting in the cytoplasmic leaflet relative  
 462 to the protein shown in grey. (E) Density of the phosphates (orange) and BDQ over the course of the

463 simulations where the antibiotic started in either the periplasmic leaflet (green) or the cytoplasmic  
464 leaflet (blue). (F) Snapshot of a single simulation containing a *Mtb* ATPase model and 8 x BDQ models  
465 showing the main positions BDQ occupied. Phosphates are shown in orange, BDQ shown in blue, c-  
466 subunits are shown in grey and the a-subunit is shown in cyan. The lipid sticks are shown in the colors  
467 illustrated in **Figure 1A**. (G) Comparison of the highest occupancy sites identified with PyLipID (surface)  
468 and BDQ from the Cryo-EM structure (PDB: 7JGC) (sticks). (H) PMF of BDQ moving through a  
469 *Mycobacterial* plasma membrane with the error shown in grey. A schematic of the PMF is shown as  
470 an insert.

471

472 Throughout 10 simulations of 10  $\mu$ s, the modeled *Mtb* ATP synthase complex  
473 was stable in the asymmetric membrane and there were no significant perturbations  
474 of the bilayer by the protein. The lipids of the *Mycobacterial* membrane do not show  
475 any strong interactions with the protein (**Figure 3D** and **SI Figure 23**), apart from CL  
476 that localizes in the a-subunit and around the c-ring in positions similar to those seen  
477 in a previous study<sup>75</sup>. The exact values for CL occupancy of each residue are shown  
478 in **SI Figure 25A**. Minimal interactions between BDQ and the ATPase were observed  
479 when the drug started in the periplasmic leaflet, but when BDQ started in the  
480 cytoplasmic leaflet there was significant occupation of the binding sites as imaged in  
481 *M. smegmatis*, **Figures 3D-G** and **SI Figures 22C,D**. There are interactions between  
482 the secondary amine group of BDQ and Glu 61 (Glu 65 in *M. smegmatis*) which has  
483 been imaged in the determined structure<sup>31</sup>, with an occupancy of ~30% of the  
484 simulation time on some subunits (**Figure 3G**). The occupancy value averaged over  
485 all subunits is shown in **SI Figure 25B**. 3 types of sites reported previously<sup>31</sup> are  
486 identified in the simulations. Most interactions are seen through the leading site (46%  
487 of the time,  $K_{off} = 5.2 \mu\text{s}^{-1}$ ) followed by the lagging site (22% of the time,  $K_{off} = 7.6 \mu\text{s}^{-1}$ )  
488 and finally further interactions around the rotor (36% of the time,  $K_{off} = 1.2 \mu\text{s}^{-1}$ , **SI**  
489 **Figure 24**). For the leading site the PMF calculations confirm this as a binding site,  
490 giving a moderate energy well of approximately 7 kJ/mol (**Figure 3H**) and making it  
491 equivalent to cholesterol binding interaction with a bovine mitochondrial ADP/ATP  
492 carrier<sup>76</sup>. Tracking the z-position of the central bead from the antibiotic over the course  
493 of the unbiased simulations with the protein shows that the binding sites are occupied  
494 to some extent by each of the drug molecules and some are flipped to the outer leaflet  
495 from the plasma leaflet, as shown in **SI Figure 22C**.

496 Resistance mechanisms against BDQ are known to involve the upregulation of  
497 MmpL5, a drug efflux pump<sup>77, 78</sup>. This suggests that BDQ must have an entry  
498 mechanism into the cytoplasm of the cell and need to access the target – the ATPase

499 – from the cytoplasm to be effective. This could explain the preference for interaction  
500 with the binding site from the cytoplasmic leaflet. When the same simulations were  
501 performed starting in either leaflet of the simple Gram-negative membrane (75% PE,  
502 15% PG, 10% CL), there was not a substantial difference in the diffusion coefficients  
503 (*Mycobacterial* membrane:  $2.2 \times 10^{-8} \text{ cm}^2/\text{s}$ , and simple membrane:  $1.7 \times 10^{-8} \text{ cm}^2/\text{s}$ ),  
504 showing that the antibiotic can move towards its target in either bilayer composition.  
505 But, unlike the *Mycobacterial* membrane (**SI Figures 22C,D**), there is no difference  
506 between the periplasmic and cytoplasmic leaflets and their interaction with the binding  
507 site in the simple symmetric membrane (**SI Figure 26**). This shows the power of  
508 modelling an asymmetric membrane to give more nuanced results than symmetric  
509 membrane models can provide.

510

## 511 **Discussion**

512 Here, we provide models for lipids constituting the *Mycobacterial* plasma membrane  
513 focused on the PIM lipids. Understanding how these lipids behave on an individual  
514 level and as a constituent of a membrane could provide key insight into the intrinsic  
515 resistance of *Mtb* to antibiotics.

516 In this CG model clustering of ions around these lipids was observed at both  
517 the single lipid and bilayer level, probing how this affects the biophysical properties of  
518 the bilayer and whether this could be exploited for treatment of TB is an interesting  
519 area for future research. The lipids did not cluster together excessively over the  
520 timescales studied and all diffused well through the membrane. This confirmed that  
521 the *Mycobacterial* cell envelope is dynamic, which could potentially be an important  
522 insight into how this cell wall functions. A low membrane bending rigidity compared to  
523 a PC and eukaryotic plasma membrane is interesting and could suggest the  
524 importance of other cell envelope components in maintaining the shape of the cell.

525 The simulations confirmed that an asymmetric plasma membrane is stable with  
526 a composition of over 50% PIM lipids – a membrane that is unique. As previously  
527 mentioned, the integral membrane proteins from *Mtb* are of interest for the  
528 development of new antibiotics for TB<sup>8</sup>, and this provides a model to simulate proteins  
529 in a native lipid environment to determine any key lipid interactions. Here, we have  
530 shown that proteins are stable in this bilayer and replicate antibiotic binding that has  
531 been seen experimentally<sup>31</sup>.

532           There is room to improve the model, for example incorporating apolar lipids  
533 (such as triglycerides<sup>14</sup>), TMM and LM/LAM when the appropriate parameters and  
534 relative amounts are available. As the membrane bending rigidity is quite low,  
535 incorporation of these other lipids, or indeed changing the concentration of lipids based  
536 on future experimental work, will prove interesting. All the AT and CG parameters  
537 developed are freely available in CHARMM-GUI Membrane Builder and Martini  
538 Maker<sup>79, 80</sup> as well as the scripts utilized in this study for the community to use (see  
539 Data Availability section). Future simulations with proteins and probing protein/lipid  
540 interactions with atomistic resolution could help further elucidate the role of these  
541 complex lipids.

542           These results are a starting point for building up an entire *Mycobacterial* cell  
543 envelope, as has been done for gram-negative bacteria<sup>81</sup>. Other *Mycobacterial* lipids  
544 have already been parameterised<sup>82</sup> and in combination could be used to build a model  
545 to study the passage of drugs through this barrier to the cell. The *Mycobacterial* cell  
546 envelope is known to change at different growth stages during its lifecycle<sup>6, 83-85</sup>. Using  
547 CG MD simulations could allow easy modifications of ratios of components – allowing  
548 understanding about drug permeability or protein behavior at different stages of  
549 infection. This could prove critical to engineering a new treatment regime for TB and  
550 non-TB *Mycobacterial* diseases<sup>86</sup>.

551

552 Data availability: <https://github.com/pstansfeld/PIM-lipids>

553 Atomistic systems and CG-membrane set-up can be performed using respectively  
554 CHARMM-GUI bilayer builder ( <https://charmm-gui.org/input/membrane.bilayer> ) and  
555 CHARMM-GUI MARTINI bilayer Maker (   
556 <https://charmm-gui.org/?doc=input/martini.bilayer> )

557

## 558 **Acknowledgements**

559 C. M. B. is supported by an MRC studentship (MR/N014294/1). R. A. C. is funded by Wellcome  
560 (208361/Z/17/Z). Research in P. J. S.'s lab is funded by Wellcome (208361/Z/17/Z), the MRC  
561 (MR/S009213/1) and BBSRC (BB/P01948X/1, BB/R002517/1 and BB/S003339/1). M. C. is  
562 supported by the CNRS-MITI grant "Modélisation du vivant" 2020. W. I. is funded by NSF  
563 (MCB-2111728). E.F is a Sir Henry Dale Fellow jointly funded by the Wellcome Trust and  
564 Royal Society (104193/Z/14/Z and 104193/Z/14/B). M. G. would like to acknowledge the  
565 European Union's Horizon 2020 research and innovation program under grant agreement



566 H2020-PHC-08-2014-643381, TBVAC2020. This work was granted access to the HPC  
567 resources of CALMIP supercomputing center (under the allocation 2021-17036) and TGCC  
568 Joliot-Curie supercomputer (under the GENCI allocation A0110712941). This project made  
569 use of time on ARCHER2 and JADE2 granted via the UK High-End Computing Consortium  
570 for Biomolecular Simulation, HECBioSim (<http://hecbiosim.ac.uk>), supported by EPSRC  
571 (grant no. EP/R029407/1). This project also used Athena and Sulis at HPC Midlands+, which  
572 were funded by the EPSRC on grants EP/P020232/1 and EP/T022108/1. We thank the  
573 University of Warwick Scientific Computing Research Technology Platform for computational  
574 access. We thank C. Cooper for fruitful discussions.

575

576

577

578 **Abbreviations**

|     |              |                                          |
|-----|--------------|------------------------------------------|
| 579 | AT:          | Atomistic                                |
| 580 | ATP:         | Adenosine triphosphate                   |
| 581 | BDQ:         | Bedaquiline                              |
| 582 | CL:          | Cardiolipin                              |
| 583 | CG:          | Coarse grained                           |
| 584 | ISZ:         | Isoniazid                                |
| 585 | LAM:         | Lipoarabinomannan                        |
| 586 | LM:          | Lipomannan                               |
| 587 | MD:          | Molecular dynamics                       |
| 588 | <i>Mtb</i> : | <i>Mycobacterium tuberculosis</i>        |
| 589 | PC:          | Phosphatidylcholine                      |
| 590 | PE:          | Phosphatidylethanolamine                 |
| 591 | PG:          | Phosphatidylglycerol                     |
| 592 | PI:          | Phosphatidylinositol                     |
| 593 | PIMs:        | Mannosylated phosphatidylinositol lipids |
| 594 | PIPs:        | Phosphatidylinositol phosphates          |
| 595 | PME:         | Particle mesh Ewald                      |
| 596 | PMF:         | Potential of mean force                  |
| 597 | TB:          | Tuberculosis                             |
| 598 | TMM:         | Trehalose monomycolate                   |
| 599 |              |                                          |
| 600 |              |                                          |

## 601 References

- 602 1. WHO *Global Tuberculosis Report 2021*; World Health Organization: Geneva, 2021.
- 603 2. Horsburgh, C. R.; Barry, C. E.; Lange, C., Treatment of Tuberculosis. *New England*
- 604 *Journal of Medicine* **2015**, *373* (22), 2149-2160.
- 605 3. WHO The End TB Strategy. [https://www.who.int/teams/global-tuberculosis-](https://www.who.int/teams/global-tuberculosis-programme/the-end-tb-strategy)
- 606 [programme/the-end-tb-strategy](https://www.who.int/teams/global-tuberculosis-programme/the-end-tb-strategy) (accessed 31-1-22).
- 607 4. WHO 1.4 million with tuberculosis, lost out on treatment during first year of COVID-
- 608 19. <https://news.un.org/en/story/2021/03/1087962> (accessed 14/4/22).
- 609 5. Chiaradia, L.; Lefebvre, C.; Parra, J.; Marcoux, J.; Burlet-Schiltz, O.; Etienne, G.;
- 610 Tropis, M.; Daffé, M., Dissecting the mycobacterial cell envelope and defining the composition
- 611 of the native mycomembrane. *Scientific Reports* **2017**, *7* (1), 12807.
- 612 6. Dulberger, C. L.; Rubin, E. J.; Boutte, C. C., The mycobacterial cell envelope — a moving
- 613 target. *Nature Reviews Microbiology* **2020**, *18* (1), 47-59.
- 614 7. Batt, S. M.; Minnikin, D. E.; Besra, G. S., The thick waxy coat of mycobacteria, a
- 615 protective layer against antibiotics and the host's immune system. *Biochemical Journal* **2020**,
- 616 *477* (10), 1983-2006.
- 617 8. Fullam, E.; Young, R. J., Physicochemical properties and Mycobacterium tuberculosis
- 618 transporters: keys to efficacious antitubercular drugs? *RSC Medicinal Chemistry* **2021**, *12* (1),
- 619 43-56.
- 620 9. Sacksteder, K. A.; Protopopova, M.; Barry, C. E., 3rd; Andries, K.; Nacy, C. A.,
- 621 Discovery and development of SQ109: a new antitubercular drug with a novel mechanism of
- 622 action. *Future Microbiol* **2012**, *7* (7), 823-37.
- 623 10. Boudehen, Y.-M.; Faucher, M.; Maréchal, X.; Miras, R.; Rech, J.; Sénèque, O.; Wallat,
- 624 M.; Demange, P.; Bouet, J.-Y.; Saurel, O.; Catty, P.; Gutierrez, C.; Neyrolles, O.,
- 625 Mycobacterial resistance to zinc poisoning requires assembly of P-ATPase-containing
- 626 membrane metal efflux platforms. *bioRxiv* **2021**, 2021.10.01.462712.
- 627 11. Bansal-Mutalik, R.; Nikaido, H., Mycobacterial outer membrane is a lipid bilayer and
- 628 the inner membrane is unusually rich in diacyl phosphatidylinositol dimannosides.
- 629 *Proceedings of the National Academy of Sciences* **2014**, *111* (13), 4958-4963.
- 630 12. Gilleron, M.; Quesniaux, V. F. J.; Puzo, G., Acylation State of the Phosphatidylinositol
- 631 Hexamannosides from *Mycobacterium bovis* Bacillus Calmette Guérin and *Mycobacterium*
- 632 *tuberculosis* H37Rv and Its Implication in Toll-like Receptor Response *Journal of Biological*
- 633 *Chemistry* **2003**, *278* (32), 29880-29889.
- 634 13. Gilleron, M.; Ronet, C.; Mempel, M.; Monsarrat, B.; Gachelin, G.; Puzo, G., Acylation
- 635 State of the Phosphatidylinositol Mannosides from Mycobacterium bovis Bacillus Calmette
- 636 Guérin and Ability to Induce Granuloma and Recruit Natural Killer T Cells. *Journal of Biological*
- 637 *Chemistry* **2001**, *276* (37), 34896-34904.
- 638 14. Jackson, M., The mycobacterial cell envelope-lipids. *Cold Spring Harb Perspect Med*
- 639 **2014**, *4* (10), a021105.
- 640 15. Kalscheuer, R.; Palacios, A.; Anso, I.; Cifuentes, J.; Anguita, J.; Jacobs, W. R., Jr;
- 641 Guerin, M. E.; Prados-Rosales, R., The Mycobacterium tuberculosis capsule: a cell structure
- 642 with key implications in pathogenesis. *Biochemical Journal* **2019**, *476* (14), 1995-2016.
- 643 16. Guerin, M. E.; Korduláková, J.; Alzari, P. M.; Brennan, P. J.; Jackson, M., Molecular
- 644 Basis of Phosphatidyl-*myo*-inositol Mannoside Biosynthesis and Regulation in Mycobacteria
- 645 *Journal of Biological Chemistry* **2010**, *285* (44), 33577-33583.

- 646 17. Corradi, V.; Sejdiu, B. I.; Mesa-Galloso, H.; Abdizadeh, H.; Noskov, S. Y.; Marrink, S.  
647 J.; Tieleman, D. P., Emerging Diversity in Lipid–Protein Interactions. *Chemical Reviews* **2019**,  
648 *119* (9), 5775-5848.
- 649 18. Xu, P.; Huang, S.; Zhang, H.; Mao, C.; Zhou, X. E.; Cheng, X.; Simon, I. A.; Shen, D.-  
650 D.; Yen, H.-Y.; Robinson, C. V.; Harpsøe, K.; Svensson, B.; Guo, J.; Jiang, H.; Gloriam, D. E.;  
651 Melcher, K.; Jiang, Y.; Zhang, Y.; Xu, H. E., Structural insights into the lipid and ligand  
652 regulation of serotonin receptors. *Nature* **2021**, *592* (7854), 469-473.
- 653 19. Jin, R.; He, S.; Black, K. A.; Clarke, O. B.; Wu, D.; Bolla, J. R.; Johnson, P.; Periasamy,  
654 A.; Wardak, A.; Czabotar, P.; Colman, P. M.; Robinson, C. V.; Laver, D.; Smith, B. J.; Gulbis,  
655 J. M., Ion currents through Kir potassium channels are gated by anionic lipids. *Nature*  
656 *Communications* **2022**, *13* (1), 490.
- 657 20. Su, C.-C.; Klenotic, P. A.; Cui, M.; Lyu, M.; Morgan, C. E.; Yu, E. W., Structures of the  
658 mycobacterial membrane protein MmpL3 reveal its mechanism of lipid transport. *PLOS*  
659 *Biology* **2021**, *19* (8), e3001370.
- 660 21. Herrera, N.; Maksaev, G.; Haswell, E. S.; Rees, D. C., Elucidating a role for the  
661 cytoplasmic domain in the Mycobacterium tuberculosis mechanosensitive channel of large  
662 conductance. *Scientific Reports* **2018**, *8* (1), 14566.
- 663 22. Ingólfsson, H. I.; Melo, M. N.; van Eerden, F. J.; Arnarez, C.; Lopez, C. A.; Wassenaar,  
664 T. A.; Periole, X.; de Vries, A. H.; Tieleman, D. P.; Marrink, S. J., Lipid Organization of the  
665 Plasma Membrane. *Journal of the American Chemical Society* **2014**, *136* (41), 14554-14559.
- 666 23. Pogozheva, I. D.; Armstrong, G. A.; Kong, L.; Hartnagel, T. J.; Carpino, C. A.; Gee, S.  
667 E.; Picarello, D. M.; Rubin, A. S.; Lee, J.; Park, S.; Lomize, A. L.; Im, W., Comparative Molecular  
668 Dynamics Simulation Studies of Realistic Eukaryotic, Prokaryotic, and Archaeal Membranes.  
669 *Journal of Chemical Information and Modeling* **2022**, *62* (4), 1036-1051.
- 670 24. Adhyapak, P.; Dong, W.; Dasgupta, S.; Dutta, A.; Duan, M.; Kapoor, S., Lipid  
671 Clustering in Mycobacterial Cell Envelope Layers Governs Spatially Resolved Solvation  
672 Dynamics. *Chemistry – An Asian Journal* **2022**, *17* (11), e202200146.
- 673 25. Newport, T. D.; Sansom, M. S. P.; Stansfeld, P. J., The MemProtMD database: a  
674 resource for membrane-embedded protein structures and their lipid interactions. *Nucleic*  
675 *Acids Research* **2019**, *47* (D1), D390-D397.
- 676 26. Stansfeld, Phillip J.; Goose, Joseph E.; Caffrey, M.; Carpenter, Elisabeth P.; Parker,  
677 Joanne L.; Newstead, S.; Sansom, Mark S. P., MemProtMD: Automated Insertion of  
678 Membrane Protein Structures into Explicit Lipid Membranes. *Structure* **2015**, *23* (7), 1350-  
679 1361.
- 680 27. Wassenaar, T. A.; Ingólfsson, H. I.; Böckmann, R. A.; Tieleman, D. P.; Marrink, S. J.,  
681 Computational Lipidomics with insane: A Versatile Tool for Generating Custom Membranes  
682 for Molecular Simulations. *Journal of Chemical Theory and Computation* **2015**, *11* (5), 2144-  
683 2155.
- 684 28. Wu, E. L.; Cheng, X.; Jo, S.; Rui, H.; Song, K. C.; Dávila-Contreras, E. M.; Qi, Y.; Lee,  
685 J.; Monje-Galvan, V.; Venable, R. M.; Klauda, J. B.; Im, W., CHARMM-GUI Membrane Builder  
686 toward realistic biological membrane simulations. *Journal of Computational Chemistry* **2014**,  
687 *35* (27), 1997-2004.
- 688 29. Chavent, M.; Karia, D.; Kalli, A. C.; Domański, J.; Duncan, A. L.; Hedger, G.; Stansfeld,  
689 P. J.; Seiradake, E.; Jones, E. Y.; Sansom, M. S. P., Interactions of the EphA2 Kinase Domain  
690 with PIPs in Membranes: Implications for Receptor Function. *Structure* **2018**, *26* (7), 1025-  
691 1034.e2.

- 692 30. Corey, R. A.; Song, W.; Duncan, A. L.; Ansell, T. B.; Sansom, M. S. P.; Stansfeld, P. J.,  
693 Identification and assessment of cardiolipin interactions with E. coli inner membrane  
694 proteins. *Sci Adv* **2021**, *7* (34).
- 695 31. Guo, H.; Courbon, G. M.; Bueler, S. A.; Mai, J.; Liu, J.; Rubinstein, J. L., Structure of  
696 mycobacterial ATP synthase bound to the tuberculosis drug bedaquiline. *Nature* **2021**, *589*  
697 (7840), 143-147.
- 698 32. Souza, P. C. T.; Alessandri, R.; Barnoud, J.; Thallmair, S.; Faustino, I.; Grünwald, F.;  
699 Patmanidis, I.; Abdizadeh, H.; Bruininks, B. M. H.; Wassenaar, T. A.; Kroon, P. C.; Melcr, J.;  
700 Nieto, V.; Corradi, V.; Khan, H. M.; Domański, J.; Javanainen, M.; Martinez-Seara, H.; Reuter,  
701 N.; Best, R. B.; Vattulainen, I.; Monticelli, L.; Periole, X.; Tieleman, D. P.; de Vries, A. H.;  
702 Marrink, S. J., Martini 3: a general purpose force field for coarse-grained molecular dynamics.  
703 *Nature Methods* **2021**, *18* (4), 382-388.
- 704 33. Alessandri, R.; Barnoud, J.; Gertsen, A. S.; Patmanidis, I.; de Vries, A. H.; Souza, P. C.  
705 T.; Marrink, S. J., Martini 3 Coarse-Grained Force Field: Small Molecules. *Advanced Theory and*  
706 *Simulations* **2022**, *5* (1), 2100391.
- 707 34. Borges-Araújo, L.; Souza, P. C. T.; Fernandes, F.; Melo, M. N., Improved  
708 Parameterization of Phosphatidylinositide Lipid Headgroups for the Martini 3 Coarse-Grain  
709 Force Field. *Journal of Chemical Theory and Computation* **2022**, *18* (1), 357-373.
- 710 35. Banerjee, P.; Lipowsky, R.; Santer, M., Coarse-Grained Molecular Model for the  
711 Glycosylphosphatidylinositol Anchor with and without Protein. *Journal of Chemical Theory*  
712 *and Computation* **2020**, *16* (6), 3889-3903.
- 713 36. Bussi, G.; Donadio, D.; Parrinello, M., Canonical sampling through velocity rescaling. *J*  
714 *Chem Phys* **2007**, *126* (1), 014101.
- 715 37. Parrinello, M.; Rahman, A., Polymorphic transitions in single crystals: A new molecular  
716 dynamics method. **1981**, *52*:12.
- 717 38. Abraham, M. J.; Murtola, T.; Schulz, R.; Páll, S.; Smith, J. C.; Hess, B.; Lindahl, E.,  
718 GROMACS: High performance molecular simulations through multi-level parallelism from  
719 laptops to supercomputers. *SoftwareX* **2015**, *1-2*, 19-25.
- 720 39. Barker, J. A.; Watts, R. O., Monte Carlo studies of the dielectric properties of water-  
721 like models. *Molecular Physics* **1973**, *26* (3), 789-792.
- 722 40. Wu, E. L.; Qi, Y.; Song, K. C.; Klauda, J. B.; Im, W., Preferred Orientations of  
723 Phosphoinositides in Bilayers and Their Implications in Protein Recognition Mechanisms. *The*  
724 *Journal of Physical Chemistry B* **2014**, *118* (16), 4315-4325.
- 725 41. Lee, J.; Patel, D. S.; Stähle, J.; Park, S.-J.; Kern, N. R.; Kim, S.; Lee, J.; Cheng, X.;  
726 Valvano, M. A.; Holst, O.; Knirel, Y. A.; Qi, Y.; Jo, S.; Klauda, J. B.; Widmalm, G.; Im, W.,  
727 CHARMM-GUI Membrane Builder for Complex Biological Membrane Simulations with  
728 Glycolipids and Lipoglycans. *Journal of Chemical Theory and Computation* **2019**, *15* (1), 775-  
729 786.
- 730 42. Vanommeslaeghe, K.; Hatcher, E.; Acharya, C.; Kundu, S.; Zhong, S.; Shim, J.; Darian,  
731 E.; Guvench, O.; Lopes, P.; Vorobyov, I.; Mackerell, A. D., Jr., CHARMM general force field: A  
732 force field for drug-like molecules compatible with the CHARMM all-atom additive biological  
733 force fields. *Journal of computational chemistry* **2010**, *31* (4), 671-690.
- 734 43. Huang, J.; Rauscher, S.; Nawrocki, G.; Ran, T.; Feig, M.; de Groot, B. L.; Grubmüller,  
735 H.; MacKerell, A. D., CHARMM36m: an improved force field for folded and intrinsically  
736 disordered proteins. *Nature Methods* **2017**, *14* (1), 71-73.

- 737 44. Essmann, U.; Perera, L.; Berkowitz, M. L.; Darden, T.; Lee, H.; Pedersen, L. G., A  
738 smooth particle mesh Ewald method. *The Journal of Chemical Physics* **1995**, *103* (19), 8577-  
739 8593.
- 740 45. Groenewald W, B. M., Croft A, Marrink S-J., Molecular Dynamics of Mycolic Acid  
741 Monolayers. *ChemRxiv* **2019**.
- 742 46. Fowler, P. W.; Hélie, J.; Duncan, A.; Chavent, M.; Koldsø, H.; Sansom, M. S. P.,  
743 Membrane stiffness is modified by integral membrane proteins. *Soft Matter* **2016**, *12* (37),  
744 7792-7803.
- 745 47. Smith, P.; Lorenz, C. D., LiPyphilic: A Python Toolkit for the Analysis of Lipid Membrane  
746 Simulations. *Journal of Chemical Theory and Computation* **2021**, *17* (9), 5907-5919.
- 747 48. Bonomi, M.; Bussi, G.; Camilloni, C.; Tribello, G. A.; Banáš, P.; Barducci, A.; Bernetti,  
748 M.; Bolhuis, P. G.; Bottaro, S.; Branduardi, D.; Capelli, R.; Carloni, P.; Ceriotti, M.; Cesari,  
749 A.; Chen, H.; Chen, W.; Colizzi, F.; De, S.; De La Pierre, M.; Donadio, D.; Drobot, V.; Ensing,  
750 B.; Ferguson, A. L.; Filizola, M.; Fraser, J. S.; Fu, H.; Gasparotto, P.; Gervasio, F. L.; Giberti,  
751 F.; Gil-Ley, A.; Giorgino, T.; Heller, G. T.; Hocky, G. M.; Iannuzzi, M.; Invernizzi, M.; Jelfs, K.  
752 E.; Jussupow, A.; Kirilin, E.; Laio, A.; Limongelli, V.; Lindorff-Larsen, K.; Löhr, T.; Marinelli,  
753 F.; Martin-Samos, L.; Masetti, M.; Meyer, R.; Michaelides, A.; Molteni, C.; Morishita, T.;  
754 Nava, M.; Paissoni, C.; Papaleo, E.; Parrinello, M.; Pfaendtner, J.; Piaggi, P.; Piccini, G.;  
755 Pietropaolo, A.; Pietrucci, F.; Pipolo, S.; Provasi, D.; Quigley, D.; Raiteri, P.; Raniolo, S.;  
756 Rydzewski, J.; Salvalaglio, M.; Sosso, G. C.; Spiwok, V.; Šponer, J.; Swenson, D. W. H.; Tiwary,  
757 P.; Valsson, O.; Vendruscolo, M.; Voth, G. A.; White, A.; The, P. c., Promoting transparency  
758 and reproducibility in enhanced molecular simulations. *Nature Methods* **2019**, *16* (8), 670-  
759 673.
- 760 49. Buchoux, S., FATSLiM: a fast and robust software to analyze MD simulations of  
761 membranes. *Bioinformatics* **2017**, *33* (1), 133-134.
- 762 50. Hunter, J. D., Matplotlib: A 2D Graphics Environment. *Computing in Science &*  
763 *Engineering* **2007**, *9* (3), 90-95.
- 764 51. Graham, J. A.; Essex, J. W.; Khalid, S., PyCGTOOL: Automated Generation of Coarse-  
765 Grained Molecular Dynamics Models from Atomistic Trajectories. *Journal of Chemical*  
766 *Information and Modeling* **2017**, *57* (4), 650-656.
- 767 52. Kim, S.; Lee, J.; Jo, S.; Brooks III, C. L.; Lee, H. S.; Im, W., CHARMM-GUI ligand reader  
768 and modeler for CHARMM force field generation of small molecules. *Journal of*  
769 *Computational Chemistry* **2017**, *38* (21), 1879-1886.
- 770 53. Waterhouse, A.; Bertoni, M.; Bienert, S.; Studer, G.; Tauriello, G.; Gumienny, R.;  
771 Heer, F. T.; de Beer, T. A P.; Rempfer, C.; Bordoli, L.; Lepore, R.; Schwede, T., SWISS-MODEL:  
772 homology modelling of protein structures and complexes. *Nucleic Acids Research* **2018**, *46*  
773 (W1), W296-W303.
- 774 54. Sievers, F.; Wilm, A.; Dineen, D.; Gibson, T. J.; Karplus, K.; Li, W.; Lopez, R.;  
775 McWilliam, H.; Remmert, M.; Söding, J.; Thompson, J. D.; Higgins, D. G., Fast, scalable  
776 generation of high-quality protein multiple sequence alignments using Clustal Omega.  
777 *Molecular Systems Biology* **2011**, *7* (1), 539.
- 778 55. Kroon, P. C. Aggregate, automate, assemble. University of Groningen, 2020.
- 779 56. Nugent, T.; Jones, D. T., Membrane protein orientation and refinement using a  
780 knowledge-based statistical potential. *BMC Bioinformatics* **2013**, *14* (1), 276.
- 781 57. Song, W.; Corey, R. A.; Ansell, T. B.; Cassidy, C. K.; Horrell, M. R.; Duncan, A. L.;  
782 Stansfeld, P. J.; Sansom, M. S. P., PyLipID: A Python Package for Analysis of Protein–Lipid



- 783 Interactions from Molecular Dynamics Simulations. *Journal of Chemical Theory and*  
784 *Computation* **2022**, *18* (2), 1188-1201.
- 785 58. Corey, R. A.; Vickery, O. N.; Sansom, M. S. P.; Stansfeld, P. J., Insights into Membrane  
786 Protein–Lipid Interactions from Free Energy Calculations. *Journal of Chemical Theory and*  
787 *Computation* **2019**, *15* (10), 5727-5736.
- 788 59. Souaille, M.; Roux, B. t., Extension to the weighted histogram analysis method:  
789 combining umbrella sampling with free energy calculations. *Computer Physics*  
790 *Communications* **2001**, *135* (1), 40-57.
- 791 60. Hub, J. S.; de Groot, B. L.; van der Spoel, D., g\_wham—A Free Weighted Histogram  
792 Analysis Implementation Including Robust Error and Autocorrelation Estimates. *Journal of*  
793 *Chemical Theory and Computation* **2010**, *6* (12), 3713-3720.
- 794 61. Schmalhorst, P. S.; Deluweit, F.; Scherrers, R.; Heisenberg, C.-P.; Sikora, M.,  
795 Overcoming the Limitations of the MARTINI Force Field in Simulations of Polysaccharides.  
796 *Journal of Chemical Theory and Computation* **2017**, *13* (10), 5039-5053.
- 797 62. Hoffmann, C.; Leis, A.; Niederweis, M.; Plitzko, J. M.; Engelhardt, H., Disclosure of  
798 the mycobacterial outer membrane: Cryo-electron tomography and vitreous sections reveal  
799 the lipid bilayer structure. *Proceedings of the National Academy of Sciences* **2008**, *105* (10),  
800 3963-3967.
- 801 63. Zuber, B.; Chami, M.; Houssin, C.; Dubochet, J.; Griffiths, G.; Daffé, M., Direct  
802 visualization of the outer membrane of mycobacteria and corynebacteria in their native state.  
803 *J Bacteriol* **2008**, *190* (16), 5672-5680.
- 804 64. Adhyapak, P.; Srivatsav, A. T.; Mishra, M.; Singh, A.; Narayan, R.; Kapoor, S.,  
805 Dynamical Organization of Compositionally Distinct Inner and Outer Membrane Lipids of  
806 Mycobacteria. *Biophysical Journal* **2020**, *118* (6), 1279-1291.
- 807 65. Hughes, A. V.; Patel, D. S.; Widmalm, G.; Klauda, J. B.; Clifton, L. A.; Im, W., Physical  
808 Properties of Bacterial Outer Membrane Models: Neutron Reflectometry & Molecular  
809 Simulation. *Biophysical Journal* **2019**, *116* (6), 1095-1104.
- 810 66. Friedman, R., Membrane-Ion Interactions. *The Journal of membrane biology* **2018**, *251*  
811 (3), 453-460.
- 812 67. Anderson, R. J.; Groundwater, P. W.; Todd, A.; Worsley, A. J., *Antibacterial agents :*  
813 *chemistry, mode of action, mechanisms of resistance and clinical applications*. Wiley-  
814 Blackwell: Chichester, 2012; p 378.
- 815 68. Dartois, V. A.; Rubin, E. J., Anti-tuberculosis treatment strategies and drug  
816 development: challenges and priorities. *Nature Reviews Microbiology* **2022**.
- 817 69. Bardou, F.; Raynaud, C.; Ramos, C.; Lanéelle, M. A.; Lanéelle, G., Mechanism of  
818 isoniazid uptake in Mycobacterium tuberculosis. *Microbiology* **1998**, *144* (9), 2539-2544.
- 819 70. Unissa, A. N.; Subbian, S.; Hanna, L. E.; Selvakumar, N., Overview on mechanisms of  
820 isoniazid action and resistance in Mycobacterium tuberculosis. *Infection, Genetics and*  
821 *Evolution* **2016**, *45*, 474-492.
- 822 71. Jackson, M.; Raynaud, C.; Lanéelle, M.-A.; Guilhot, C.; Laurent-Winter, C.;  
823 Ensergueix, D.; Gicquel, B.; Daffé, M., Inactivation of the antigen 85C gene profoundly affects  
824 the mycolate content and alters the permeability of the Mycobacterium tuberculosis cell  
825 envelope. *Molecular Microbiology* **1999**, *31* (5), 1573-1587.
- 826 72. Haagsma, A. C.; Podasca, I.; Koul, A.; Andries, K.; Guillemont, J.; Lill, H.; Bald, D.,  
827 Probing the interaction of the diarylquinoline TMC207 with its target mycobacterial ATP  
828 synthase. *PLoS One* **2011**, *6* (8), e23575-e23575.

- 829 73. Sarathy, J. P.; Gruber, G.; Dick, T., Re-Understanding the Mechanisms of Action of the  
830 Anti-Mycobacterial Drug Bedaquiline. *Antibiotics (Basel)* **2019**, *8* (4), 261.
- 831 74. Greenwood Daniel, J.; Dos Santos Mariana, S.; Huang, S.; Russell Matthew, R. G.;  
832 Collinson Lucy, M.; MacRae James, I.; West, A.; Jiang, H.; Gutierrez Maximiliano, G.,  
833 Subcellular antibiotic visualization reveals a dynamic drug reservoir in infected macrophages.  
834 *Science* **2019**, *364* (6447), 1279-1282.
- 835 75. Duncan, A. L.; Robinson, A. J.; Walker, J. E., Cardiolipin binds selectively but transiently  
836 to conserved lysine residues in the rotor of metazoan ATP synthases. *Proceedings of the*  
837 *National Academy of Sciences* **2016**, *113* (31), 8687-8692.
- 838 76. Corey, R. A.; Stansfeld, P. J.; Sansom, M. S. P., The energetics of protein-lipid  
839 interactions as viewed by molecular simulations. *Biochem Soc Trans* **2020**, *48* (1), 25-37.
- 840 77. Briffotiaux, J.; Huang, W.; Wang, X.; Gicquel, B., MmpS5/MmpL5 as an efflux pump in  
841 Mycobacterium species. *Tuberculosis* **2017**, *107*, 13-19.
- 842 78. Degiacomi, G.; Sammartino, J. C.; Sinigiani, V.; Marra, P.; Urbani, A.; Pasca, M. R., In  
843 vitro Study of Bedaquiline Resistance in Mycobacterium tuberculosis Multi-Drug Resistant  
844 Clinical Isolates. *Frontiers in Microbiology* **2020**, *11*.
- 845 79. Qi, Y.; Ingólfsson, H. I.; Cheng, X.; Lee, J.; Marrink, S. J.; Im, W., CHARMM-GUI Martini  
846 Maker for Coarse-Grained Simulations with the Martini Force Field. *Journal of Chemical*  
847 *Theory and Computation* **2015**, *11* (9), 4486-4494.
- 848 80. CHARMM-GUI, Martini Maker now supports Martini 3. @CharmmGui, Ed. Twitter:  
849 2022.
- 850 81. Im, W.; Khalid, S., Molecular Simulations of Gram-Negative Bacterial Membranes  
851 Come of Age. *Annual Review of Physical Chemistry* **2020**, *71* (1), 171-188.
- 852 82. Augenstreich, J.; Haanappel, E.; Ferré, G.; Czaplicki, G.; Jolibois, F.; Destainville, N.;  
853 Guilhot, C.; Milon, A.; Astarie-Dequeker, C.; Chavent, M., The conical shape of DIM lipids  
854 promotes *Mycobacterium tuberculosis* infection of macrophages. *Proceedings of the National*  
855 *Academy of Sciences* **2019**, *116* (51), 25649-25658.
- 856 83. Queiroz, A.; Riley, L. W., Bacterial immunostat: Mycobacterium tuberculosis lipids and  
857 their role in the host immune response. *Rev Soc Bras Med Trop* **2017**, *50* (1), 9-18.
- 858 84. Abrahams, K. A.; Besra, G. S., Synthesis and recycling of the mycobacterial cell  
859 envelope. *Current Opinion in Microbiology* **2021**, *60*, 58-65.
- 860 85. Modak, B.; Girkar, S.; Narayan, R.; Kapoor, S., Mycobacterial Membranes as  
861 Actionable Targets for Lipid-Centric Therapy in Tuberculosis. *Journal of Medicinal Chemistry*  
862 **2022**, *65* (4), 3046-3065.
- 863 86. Dartois, V.; Dick, T., Drug development challenges in nontuberculous mycobacterial  
864 lung disease: TB to the rescue. *Journal of Experimental Medicine* **2022**, *219* (6).
- 865
